# Supplementary material
Source: Research Square preprint supplement (doi:10.21203/rs.3.rs-10121372/v1)
Supplement: Supplementary file 1 [file 339fed96390a1ceb5ababd21.docx]

# **Additional file 1**

# **File name:** Additional file 1.docx

# **Title:** List of Abbreviations

# **Description:** A complete list of abbreviations used in the manuscript, organized alphabetically (A–Z), with full terms provided for each abbreviation.

# **List of Abbreviations**

| **Abbreviation** | **Full Form** |
| --- | --- |
| AST | Antimicrobial susceptibility testing |
| BMI | Body mass index |
| BPPL | Bacterial Priority Pathogens List |
| CARSS | China Antimicrobial Resistance Surveillance System |
| CI | Confidence interval |
| CLSI | Clinical and Laboratory Standards Institute |
| CNY | Chinese Yuan |
| COPD | Chronic obstructive pulmonary disease |
| CoNS | *Coagulase-negative staphylococci* |
| CRAB | Carbapenem-resistant *Acinetobacter baumannii* |
| GLASS | Global Antimicrobial Resistance and Use Surveillance System |
| ICU | Intensive care unit |
| LOS | Length of hospital stay |
| MDRO | Multidrug-resistant organism |
| OR | Odds ratio |
| PDR | Pan-drug resistance |
| POP | Postoperative pneumonia |
| WHO | World Health Organization |
| XDR | Extensive drug resistance |
